# Supplementary material for: Age-dependent formation of TMEM106B amyloid filaments in human brains
Source: PubMed Central journal article supplement (PMC9095482; doi:10.1038/s41586-022-04650-z), 2022-03-28
Supplement: 41586_2022_4650_MOESM1_ESM.pdf [file 41586_2022_4650_MOESM1_ESM.pdf]

**Supplementary information**

---

**Age-dependent formation of TMEM106B amyloid filaments in human brains**

---

In the format provided by the authors and unedited

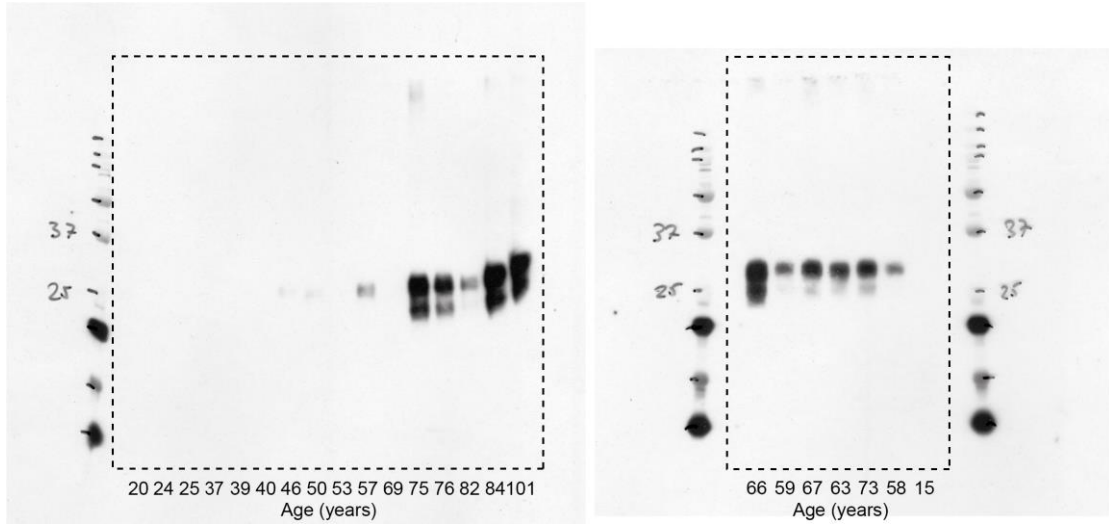

**Supplementary Figure 1.** Source images for Western blots shown in Figure 2.
